# Supplementary material
Source: PubMed Central journal article supplement (PMC4826308)

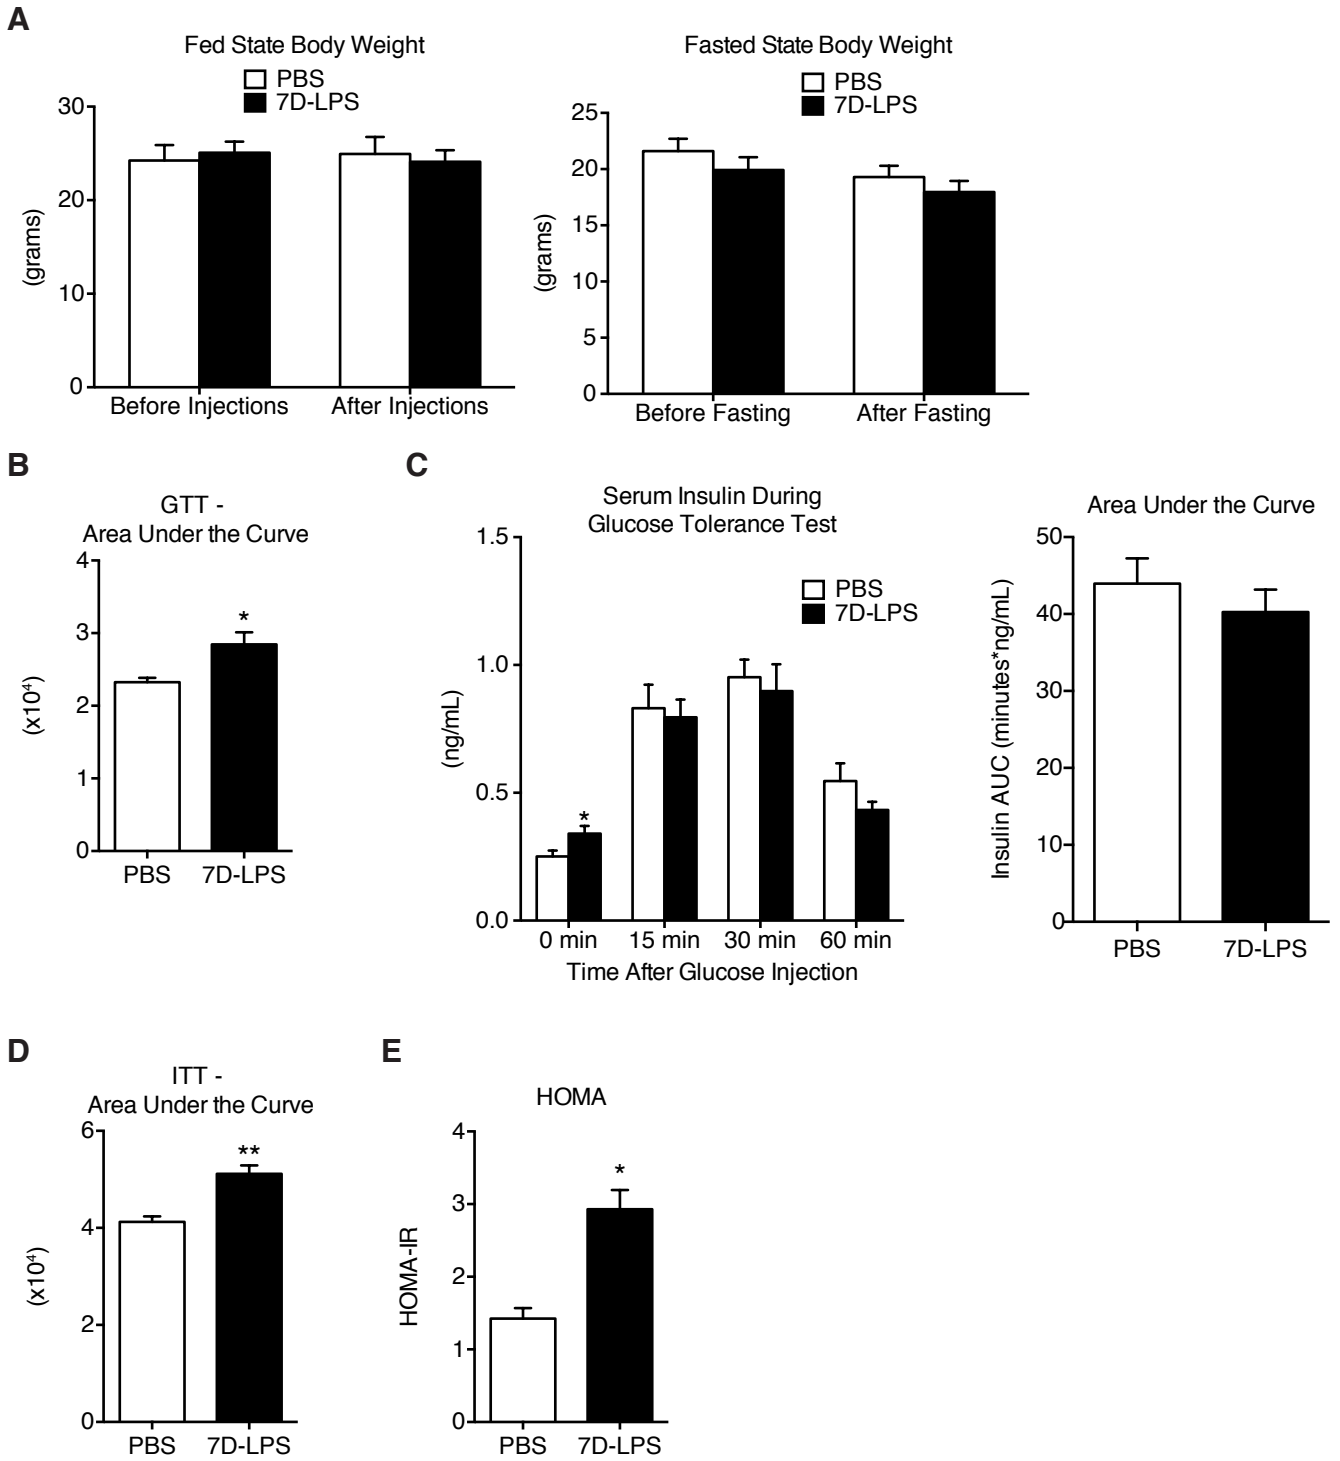

Supplement: NIHMS760145-supplement-3.pdf [file NIHMS760145-supplement-3.pdf]

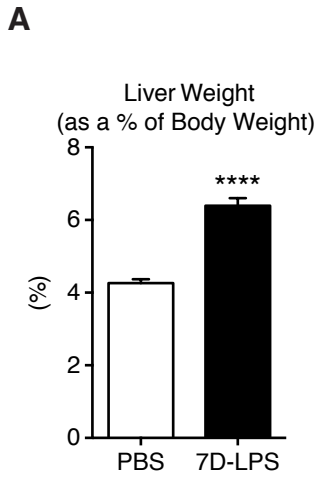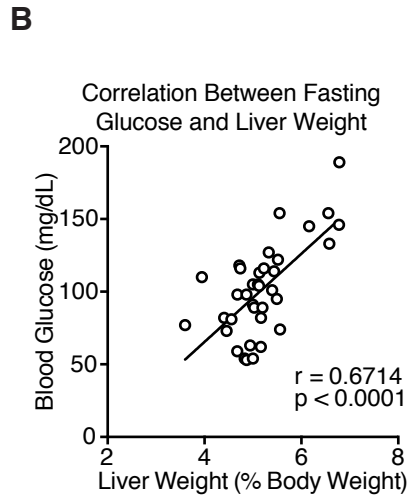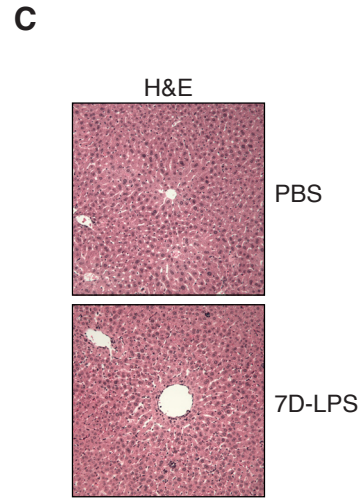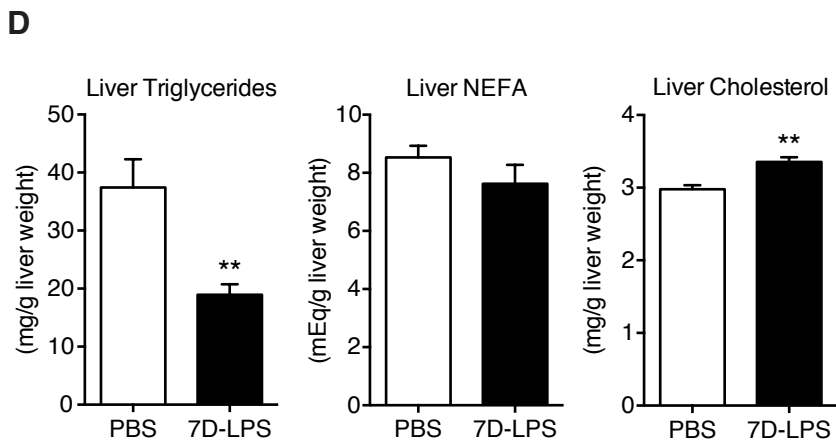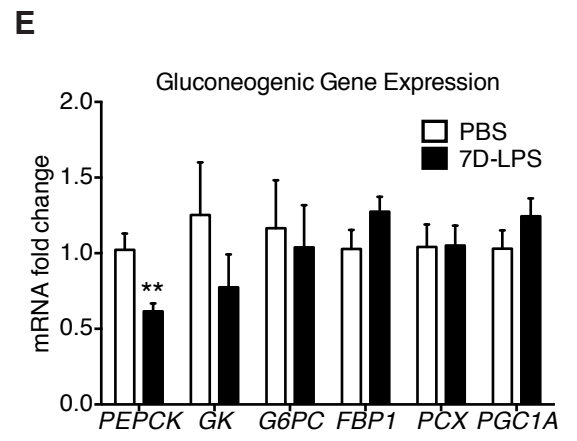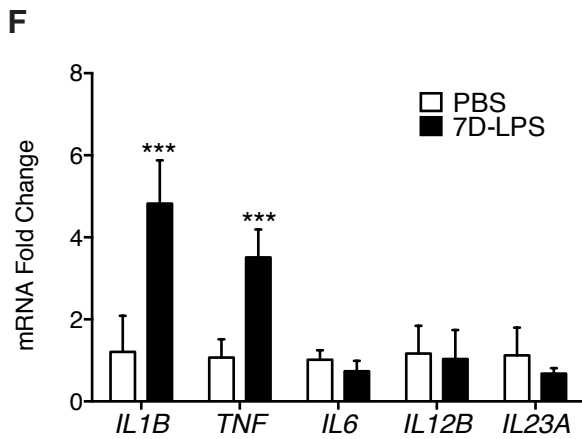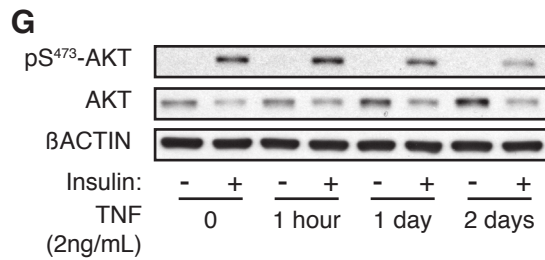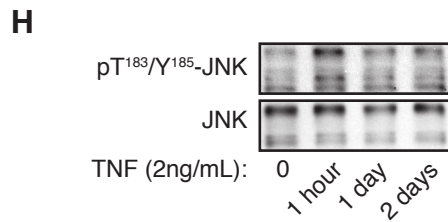

Supplement: NIHMS760145-supplement-4.pdf [file NIHMS760145-supplement-4.pdf]

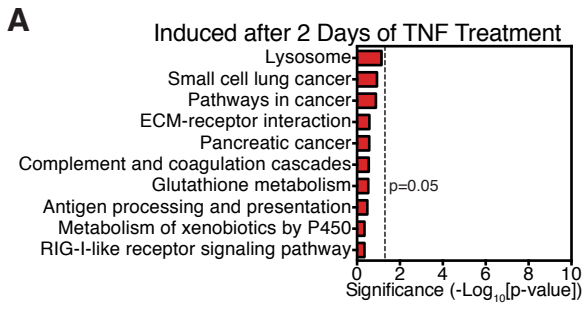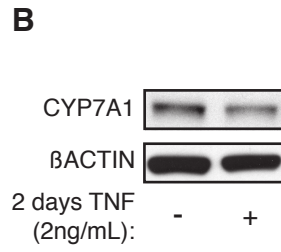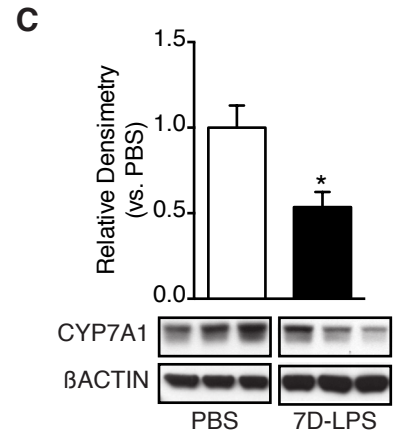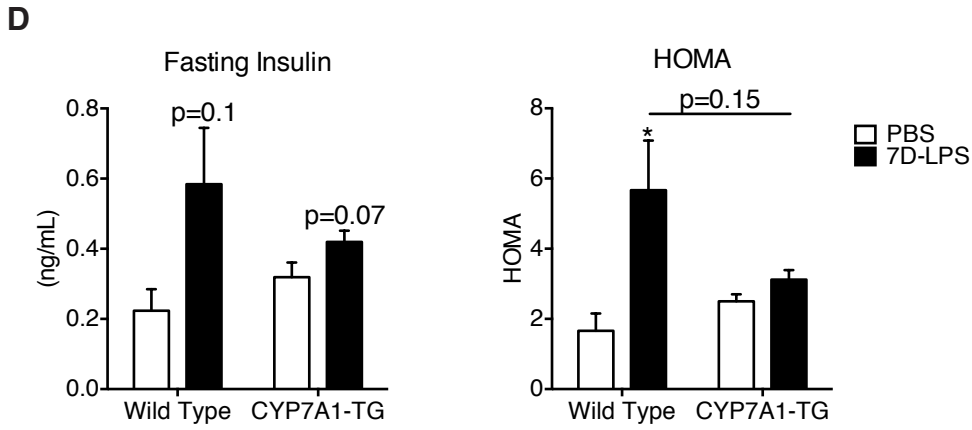

Supplement: NIHMS760145-supplement-5.pdf [file NIHMS760145-supplement-5.pdf]

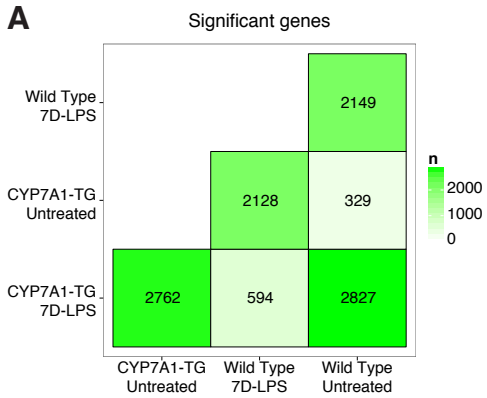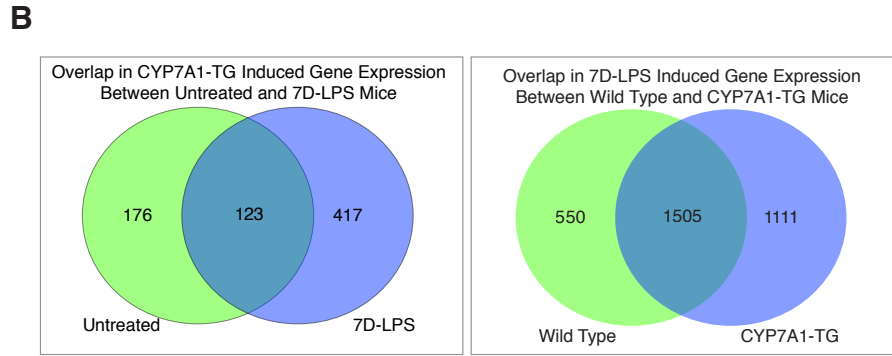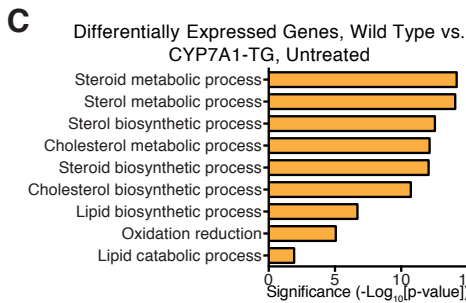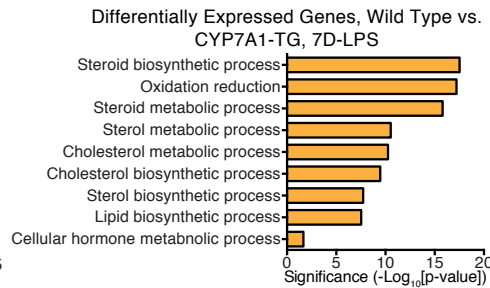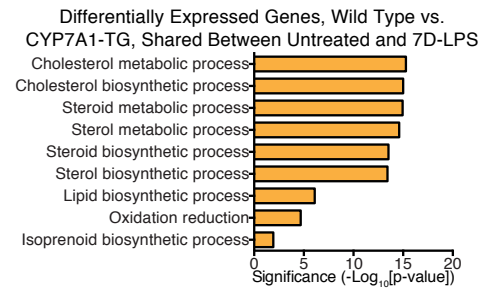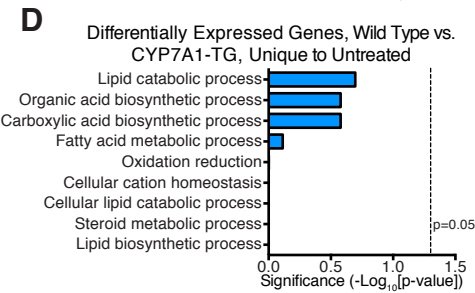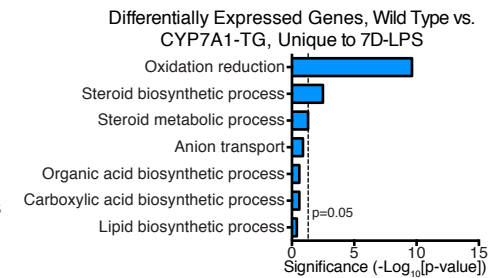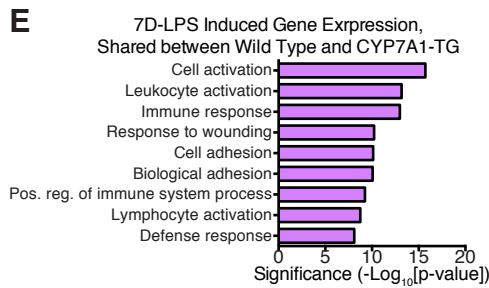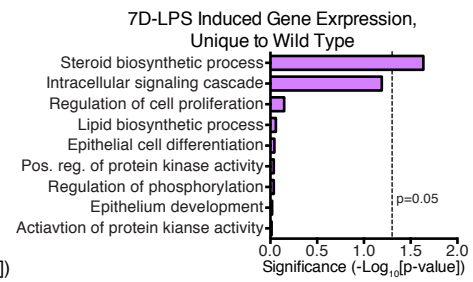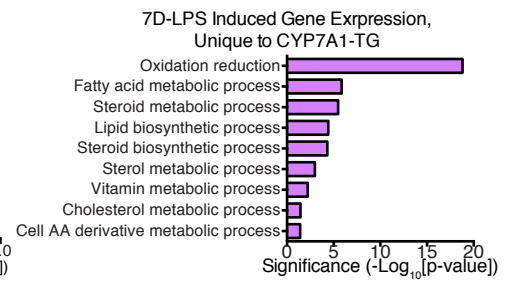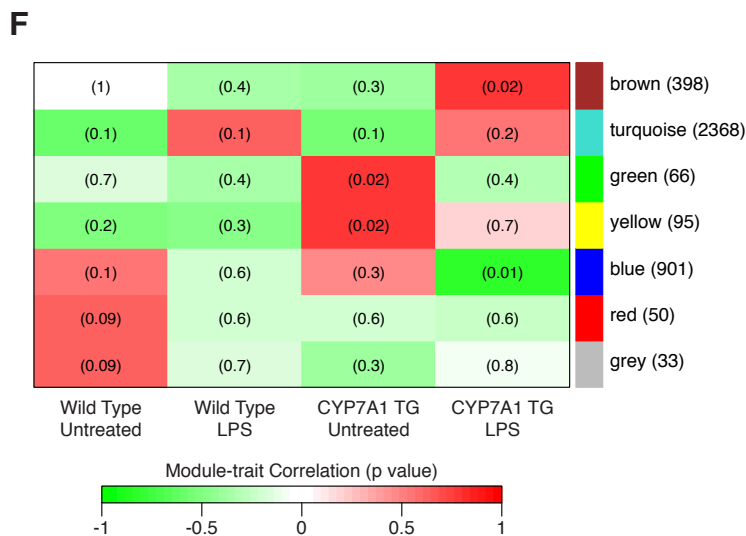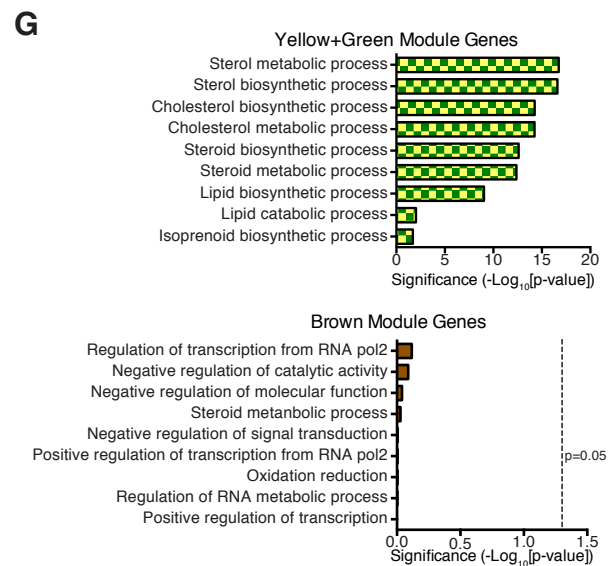

Supplement: NIHMS760145-supplement-6.pdf [file NIHMS760145-supplement-6.pdf]

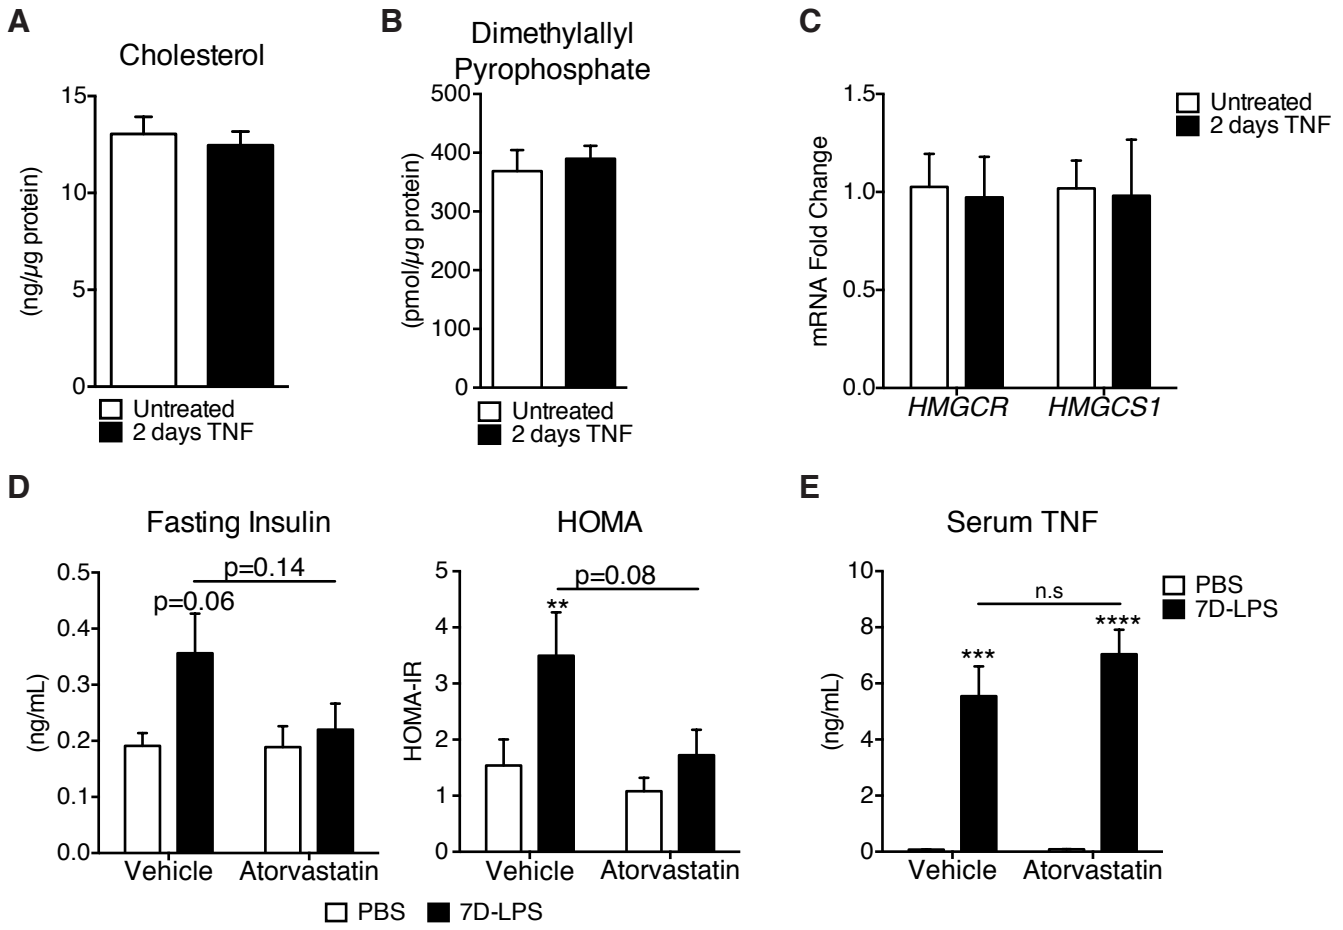

Supplement: NIHMS760145-supplement-7.pdf [file NIHMS760145-supplement-7.pdf]

**A**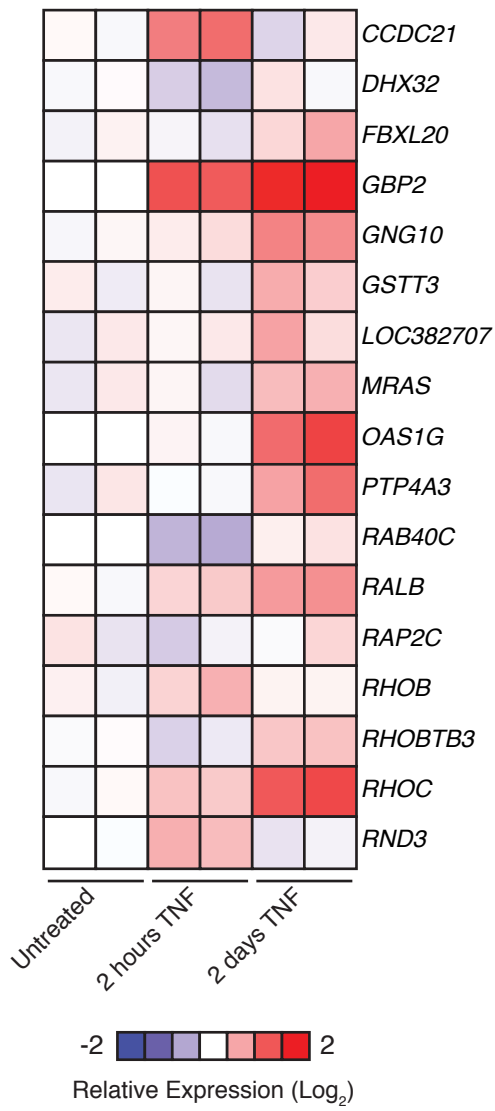**B**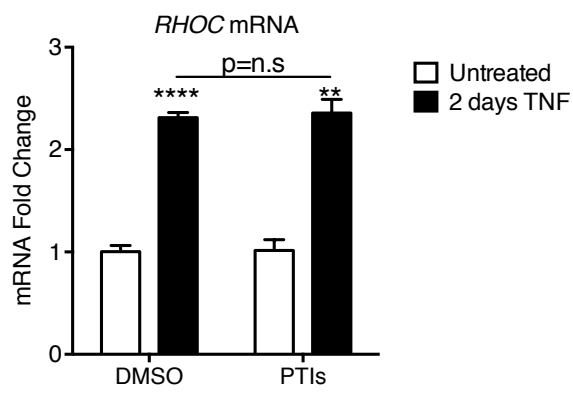**C**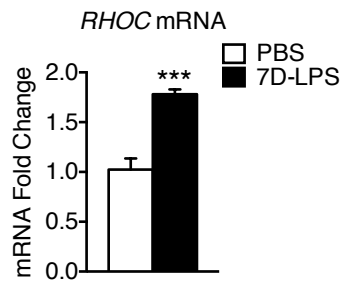**D**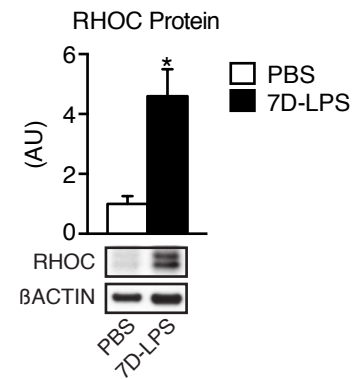**E**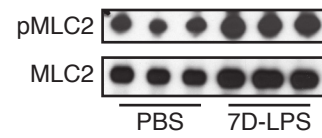

Supplement: NIHMS760145-supplement-8.pdf [file NIHMS760145-supplement-8.pdf]

**A**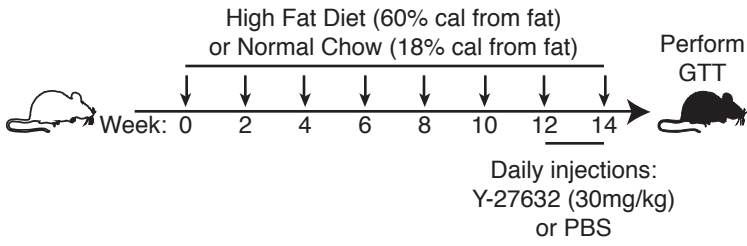**B**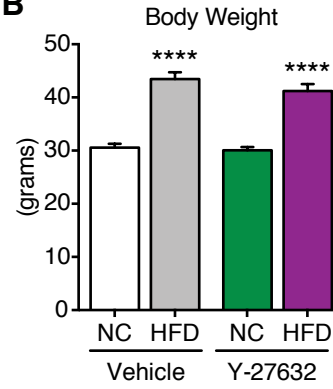**C**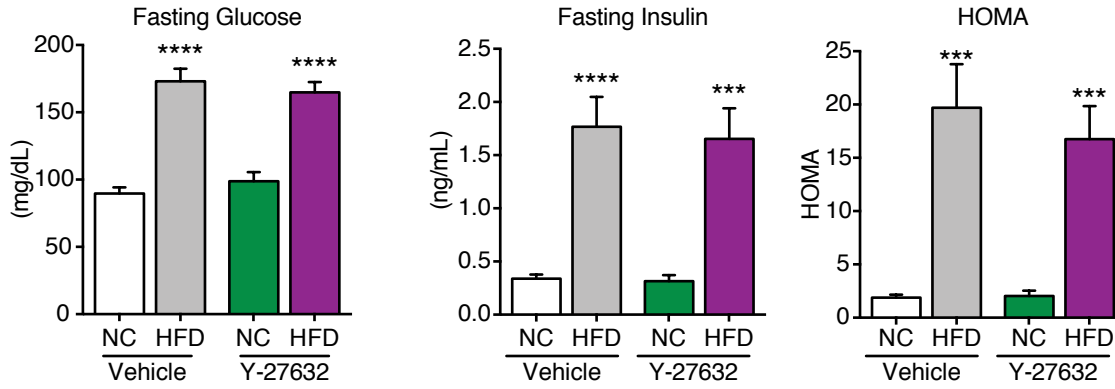**D**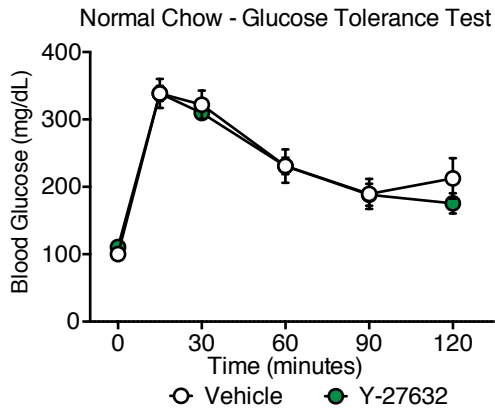**E**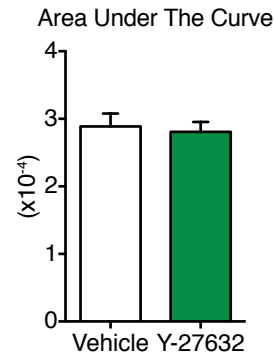**F**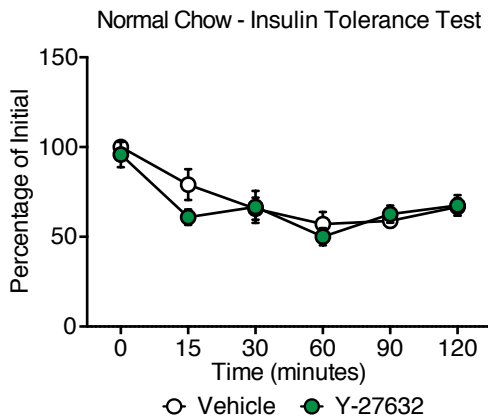**G**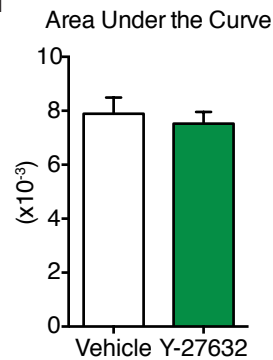

Supplement: NIHMS760145-supplement-9.pdf [file NIHMS760145-supplement-9.pdf]
